# Supplementary material for: Local Sustained GM-CSF Delivery by Genetically Engineered Encapsulated Cells Enhanced Both Cellular and Humoral SARS-CoV-2 Spike-Specific Immune Response in an Experimental Murine Spike DNA Vaccination Model
Source: MDPI journal article supplement (doi:10.3390/vaccines9050484), 2021-05-10
Supplement: s1 [file s1]

## Supplementary Material

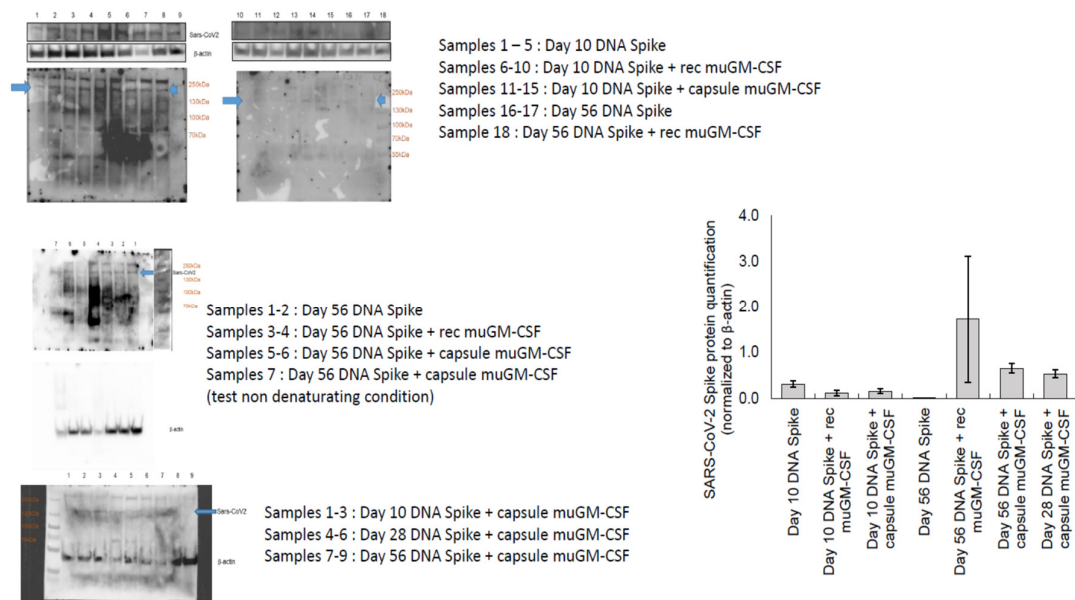

**Figure S1.** Uncropped Western Blot.

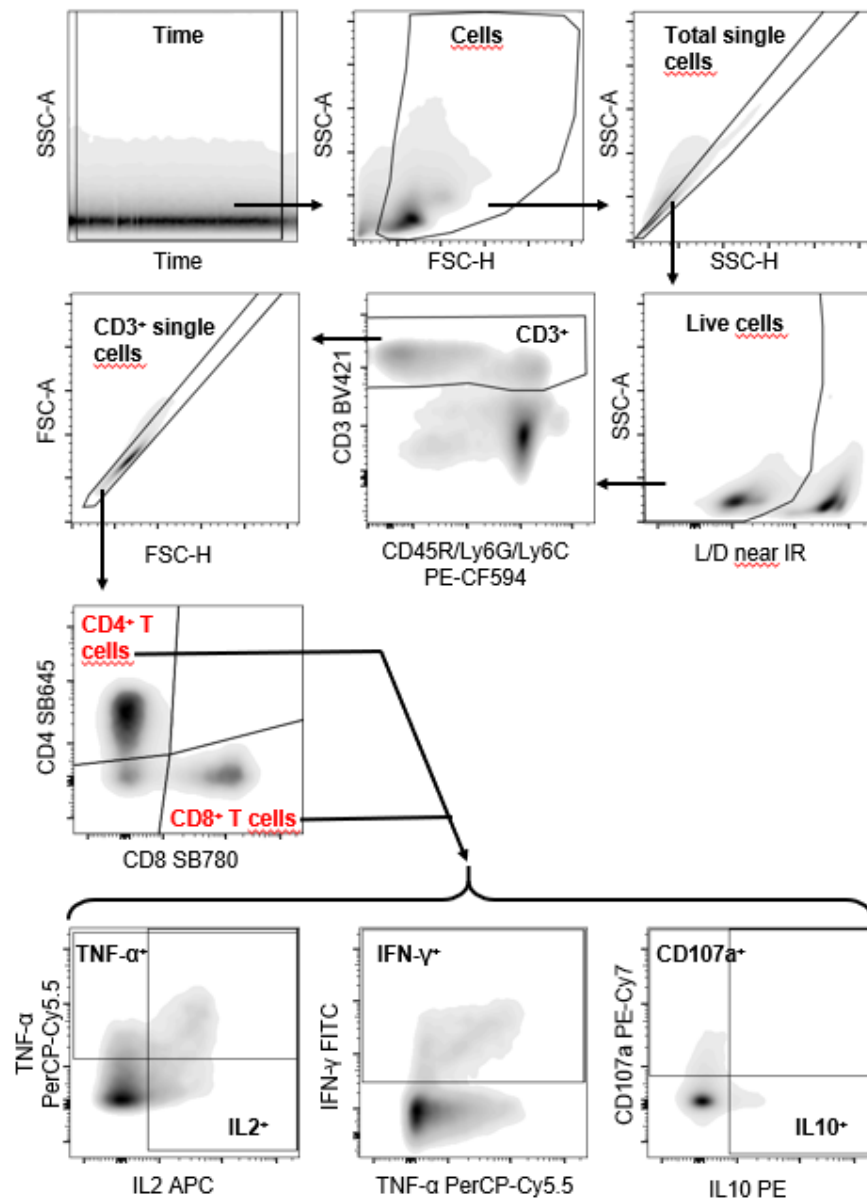

**Figure S2.** Flow cytometry gating strategy. At Days 10 and 28, splenocytes were stimulated with spike protein peptide pools and the functionality of T cells was measured by intracellular cytokine staining. After eliminating the doublets and dead cells, live CD3<sup>+</sup> single cell population were divided into CD4<sup>+</sup> and CD8<sup>+</sup> T cell populations. For each population, the percentage of TNF- $\alpha$ <sup>+</sup>, IL2<sup>+</sup>, IFN- $\gamma$ <sup>+</sup>, CD107a<sup>+</sup> and IL10<sup>+</sup> cells is presented.

**Table S1.** Listing of SARS-CoV-2 spike peptides.

| Code Peptide | Pool | Molecular Weight<br>Average | Sequence                      |
|--------------|------|-----------------------------|-------------------------------|
| 1            | 1    | 1627.82                     | S-Q-C-V-N-L-T-T-R-T-Q-L-P-P-A |
| 2            | 1    | 1839.89                     | D-L-F-L-P-F-F-S-N-V-T-W-F-H-A |
| 3            | 1    | 1615.87                     | T-L-D-S-K-T-Q-S-L-L-I-V-N-N-A |
| 4            | 1    | 1819.81                     | N-K-S-W-M-E-S-E-F-R-V-Y-S-S-A |
| 5            | 1    | 1668.98                     | L-P-I-G-I-N-I-T-R-F-Q-T-L-L-A |
| 6            | 1    | 1376.61                     | L-T-P-G-D-S-S-S-G-W-T-A-G-A-A |
| 7            | 1    | 1765.89                     | S-V-Y-A-W-N-R-K-R-I-S-N-C-V-A |
| 8            | 1    | 1674.86                     | A-D-S-F-V-I-R-G-D-E-V-R-Q-I-A |

|    |   |         |                               |
|----|---|---------|-------------------------------|
| 9  | 1 | 1581.84 | D-E-V-R-Q-I-A-P-G-Q-T-G-K-I-A |
| 10 | 1 | 1717.79 | Y-N-Y-K-L-P-D-D-F-T-G-C-V-I-A |
| 11 | 1 | 1808.92 | L-K-P-F-E-R-D-I-S-T-E-I-Y-Q-A |
| 12 | 1 | 1680.76 | P-F-Q-Q-F-G-R-D-I-A-D-T-T-D-A |
| 13 | 1 | 1619.78 | A-V-L-Y-Q-D-V-N-C-T-E-V-P-V-A |
| 14 | 1 | 1694.90 | M-F-V-F-L-V-L-L-P-L-V-S-S-Q-C |
| 15 | 1 | 1611.93 | L-L-I-V-N-N-A-T-N-V-V-I-K-V-C |
| 16 | 1 | 1654.74 | L-K-Y-N-E-N-G-T-I-T-D-A-V-D-C |
| 17 | 1 | 1715.78 | Y-S-V-L-Y-N-S-A-S-F-S-T-F-K-C |
| 18 | 1 | 1686.80 | F-K-C-Y-G-V-S-P-T-K-L-N-D-L-C |
| 19 | 1 | 1719.92 | K-S-N-I-I-R-G-W-I-F-G-T-T-L-D |
| 20 | 1 | 1830.00 | F-K-I-Y-S-K-H-T-P-I-N-L-V-R-D |
| 21 | 1 | 1783.90 | R-T-F-L-L-K-Y-N-E-N-G-T-I-T-D |
| 22 | 1 | 1681.82 | G-Q-T-G-K-I-A-D-Y-N-Y-K-L-P-D |
| 23 | 1 | 1968.06 | Y-R-L-F-R-K-S-N-L-K-P-F-E-R-D |
| 24 | 1 | 1808.95 | K-K-F-L-P-F-Q-Q-F-G-R-D-I-A-D |
| 25 | 1 | 1609.73 | Q-D-V-N-C-T-E-V-P-V-A-I-H-A-D |
| 26 | 1 | 1777.87 | M-D-L-E-G-K-Q-G-N-F-K-N-L-R-E |
| 27 | 1 | 1818.95 | R-K-S-N-L-K-P-F-E-R-D-I-S-T-E |
| 28 | 1 | 1643.79 | I-A-D-T-T-D-A-V-R-D-P-Q-T-L-E |
| 29 | 1 | 1681.75 | S-N-Q-V-A-V-L-Y-Q-D-V-N-C-T-E |
| 30 | 1 | 1792.87 | T-N-S-F-T-R-G-V-Y-Y-P-D-K-V-F |
| 31 | 1 | 1762.93 | K-V-F-R-S-S-V-L-H-S-T-Q-D-L-F |
| 32 | 1 | 1736.87 | S-S-V-L-H-S-T-Q-D-L-F-L-P-F-F |
| 33 | 1 | 1670.85 | F-H-A-I-H-V-S-G-T-N-G-T-K-R-F |
| 34 | 1 | 1724.85 | N-N-A-T-N-V-V-I-K-V-C-E-F-Q-F |
| 35 | 1 | 1692.70 | S-S-A-N-N-C-T-F-E-Y-V-S-Q-P-F |
| 36 | 1 | 1675.83 | G-A-A-A-Y-Y-V-G-Y-L-Q-P-R-T-F |
| 37 | 1 | 1714.80 | T-N-L-C-P-F-G-E-V-F-N-A-T-R-F |
| 38 | 1 | 1696.88 | N-G-V-G-Y-Q-P-Y-R-V-V-V-L-S-F |
| 39 | 1 | 1754.90 | K-S-T-N-L-V-K-N-K-C-V-N-F-N-F |
| 40 | 1 | 1550.82 | G-L-T-G-T-G-V-L-T-E-S-N-K-K-F |
| 41 | 1 | 1726.86 | L-T-P-T-W-R-V-Y-S-T-G-S-N-V-F |
| 42 | 1 | 1707.86 | R-T-Q-L-P-P-A-Y-T-N-S-F-T-R-G |
| 43 | 1 | 1638.78 | N-V-T-W-F-H-A-I-H-V-S-G-T-N-G |
| 44 | 1 | 1640.84 | G-V-Y-F-A-S-T-E-K-S-N-I-I-R-G |
| 45 | 1 | 1677.87 | A-S-T-E-K-S-N-I-I-R-G-W-I-F-G |
| 46 | 1 | 1839.95 | N-F-K-N-L-R-E-F-V-F-K-N-I-D-G |
| 47 | 1 | 1673.91 | S-K-H-T-P-I-N-L-V-R-D-L-P-Q-G |
| 48 | 1 | 1854.95 | Y-L-Q-P-R-T-F-L-L-K-Y-N-E-N-G |
| 49 | 1 | 1656.83 | S-E-T-K-C-T-L-K-S-F-T-V-E-K-G |
| 50 | 1 | 1676.86 | S-I-V-R-F-P-N-I-T-N-L-C-P-F-G |
| 51 | 1 | 1758.84 | K-I-A-D-Y-N-Y-K-L-P-D-D-F-T-G |
| 52 | 1 | 1572.78 | V-I-A-W-N-S-N-N-L-D-S-K-V-G-G |
| 53 | 1 | 1730.83 | H-A-D-Q-L-T-P-T-W-R-V-Y-S-T-G |
| 54 | 1 | 1857.97 | V-F-K-N-I-D-G-Y-F-K-I-Y-S-K-H |
| 55 | 1 | 1862.00 | Y-Q-P-Y-R-V-V-V-L-S-F-E-L-L-H |
| 56 | 1 | 1635.90 | I-F-G-T-T-L-D-S-K-T-Q-S-L-L-I |
| 57 | 1 | 1888.01 | L-R-E-F-V-F-K-N-I-D-G-Y-F-K-I |
| 58 | 1 | 1594.85 | P-Q-G-F-S-A-L-E-P-L-V-D-L-P-I |
| 59 | 1 | 1562.88 | S-A-L-E-P-L-V-D-L-P-I-G-I-N-I |
| 60 | 1 | 1697.87 | T-D-A-V-R-D-P-Q-T-L-E-I-L-D-I |
| 61 | 1 | 1876.85 | F-Q-F-C-N-D-P-F-L-G-V-Y-Y-H-K |
| 62 | 1 | 1750.86 | Q-P-F-L-M-D-L-E-G-K-Q-G-N-F-K |
| 63 | 1 | 1810.97 | G-K-Q-G-N-F-K-N-L-R-E-F-V-F-K |
| 64 | 1 | 1541.85 | P-A-T-V-C-G-P-K-K-S-T-N-L-V-K |

|     |   |         |                               |
|-----|---|---------|-------------------------------|
| 65  | 1 | 1805.79 | N-C-T-F-E-Y-V-S-Q-P-F-L-M-D-L |
| 66  | 1 | 1638.90 | P-I-N-L-V-R-D-L-P-Q-G-F-S-A-L |
| 67  | 1 | 1606.75 | V-D-C-A-L-D-P-L-S-E-T-K-C-T-L |
| 68  | 1 | 1727.91 | Q-P-T-E-S-I-V-R-F-P-N-I-T-N-L |
| 69  | 1 | 1663.82 | S-F-S-T-F-K-C-Y-G-V-S-P-T-K-L |
| 70  | 1 | 1773.89 | L-D-S-K-V-G-G-N-Y-N-Y-L-Y-R-L |
| 71  | 1 | 1512.80 | V-I-T-P-G-T-N-T-S-N-Q-V-A-V-L |
| 72  | 1 | 1718.86 | T-N-G-T-K-R-F-D-N-P-V-L-P-F-N |
| 73  | 1 | 1674.74 | P-F-N-D-G-V-Y-F-A-S-T-E-K-S-N |
| 74  | 1 | 1794.92 | I-D-G-Y-F-K-I-Y-S-K-H-T-P-I-N |
| 75  | 1 | 1802.93 | N-F-R-V-Q-P-T-E-S-I-V-R-F-P-N |
| 76  | 1 | 1710.80 | F-P-N-I-T-N-L-C-P-F-G-E-V-F-N |
| 77  | 1 | 1650.72 | L-P-D-D-F-T-G-C-V-I-A-W-N-S-N |
| 78  | 1 | 1542.63 | Y-Q-A-G-S-T-P-C-N-G-V-E-G-F-N |
| 79  | 1 | 1434.67 | P-C-S-F-G-G-V-S-V-I-T-P-G-T-N |
| 80  | 1 | 1731.82 | P-P-A-Y-T-N-S-F-T-R-G-V-Y-Y-P |
| 81  | 1 | 1753.81 | N-V-V-I-K-V-C-E-F-Q-F-C-N-D-P |
| 82  | 1 | 1815.00 | R-F-Q-T-L-L-A-L-H-R-S-Y-L-T-P |
| 83  | 1 | 1532.66 | E-N-G-T-I-T-D-A-V-D-C-A-L-D-P |
| 84  | 1 | 1974.07 | Y-N-Y-L-Y-R-L-F-R-K-S-N-L-K-P |
| 85  | 1 | 1665.77 | E-R-D-I-S-T-E-I-Y-Q-A-G-S-T-P |
| 86  | 1 | 1633.64 | S-T-P-C-N-G-V-E-G-F-N-C-Y-F-P |
| 87  | 1 | 1766.77 | G-F-N-C-Y-F-P-L-Q-S-Y-G-F-Q-P |
| 88  | 1 | 1641.73 | Q-S-Y-G-F-Q-P-T-N-G-V-G-Y-Q-P |
| 89  | 1 | 1553.78 | L-S-F-E-L-L-H-A-P-A-T-V-C-G-P |
| 90  | 1 | 1647.77 | F-G-R-D-I-A-D-T-T-D-A-V-R-D-P |
| 91  | 1 | 1592.78 | C-T-E-V-P-V-A-I-H-A-D-Q-L-T-P |
| 92  | 1 | 1645.84 | P-L-V-S-S-Q-C-V-N-L-T-T-R-T-Q |
| 93  | 1 | 1721.90 | I-R-G-W-I-F-G-T-T-L-D-S-K-T-Q |
| 94  | 1 | 1782.84 | E-Y-V-S-Q-P-F-L-M-D-L-E-G-K-Q |
| 95  | 1 | 1694.96 | P-L-V-D-L-P-I-G-I-N-I-T-R-F-Q |
| 96  | 1 | 1589.74 | G-W-T-A-G-A-A-A-Y-Y-V-G-Y-L-Q |
| 97  | 1 | 1707.91 | T-G-V-L-T-E-S-N-K-K-F-L-P-F-Q |
| 98  | 1 | 1430.69 | G-G-V-S-V-I-T-P-G-T-N-T-S-N-Q |
| 99  | 1 | 1775.87 | S-F-T-V-E-K-G-I-Y-Q-T-S-N-F-R |
| 100 | 1 | 1800.90 | V-F-N-A-T-R-F-A-S-V-Y-A-W-N-R |
| 101 | 1 | 1761.83 | D-L-C-F-T-N-V-Y-A-D-S-F-V-I-R |
| 102 | 1 | 1825.94 | T-E-S-N-K-K-F-L-P-F-Q-Q-F-G-R |
| 103 | 1 | 1675.84 | N-L-T-T-R-T-Q-L-P-P-A-Y-T-N-S |
| 104 | 1 | 1787.87 | P-F-F-S-N-V-T-W-F-H-A-I-H-V-S |
| 105 | 1 | 1794.86 | N-D-P-F-L-G-V-Y-Y-H-K-N-N-K-S |
| 106 | 1 | 1854.86 | L-G-V-Y-Y-H-K-N-N-K-S-W-M-E-S |
| 107 | 1 | 1782.02 | I-N-I-T-R-F-Q-T-L-L-A-L-H-R-S |
| 108 | 1 | 1628.84 | L-L-A-L-H-R-S-Y-L-T-P-G-D-S-S |
| 109 | 1 | 1853.99 | T-R-F-A-S-V-Y-A-W-N-R-K-R-I-S |
| 110 | 1 | 1702.79 | R-I-S-N-C-V-A-D-Y-S-V-L-Y-N-S |
| 111 | 1 | 1624.70 | C-V-A-D-Y-S-V-L-Y-N-S-A-S-F-S |
| 112 | 1 | 1659.71 | Y-N-S-A-S-F-S-T-F-K-C-Y-G-V-S |
| 113 | 1 | 1702.78 | T-K-L-N-D-L-C-F-T-N-V-Y-A-D-S |
| 114 | 1 | 1639.72 | F-T-G-C-V-I-A-W-N-S-N-N-L-D-S |
| 115 | 1 | 1848.95 | V-G-G-N-Y-N-Y-L-Y-R-L-F-R-K-S |
| 116 | 1 | 1555.74 | F-N-F-N-G-L-T-G-T-G-V-L-T-E-S |
| 117 | 1 | 1699.83 | R-D-P-Q-T-L-E-I-L-D-I-T-P-C-S |
| 118 | 1 | 1597.90 | L-V-L-L-P-L-V-S-S-Q-C-V-N-L-T |
| 119 | 1 | 1797.89 | Y-Y-P-D-K-V-F-R-S-S-V-L-H-S-T |
| 120 | 1 | 1751.84 | H-S-T-Q-D-L-F-L-P-F-F-S-N-V-T |

|     |   |         |                               |
|-----|---|---------|-------------------------------|
| 121 | 1 | 1639.78 | N-P-V-L-P-F-N-D-G-V-Y-F-A-S-T |
| 122 | 1 | 1736.70 | M-E-S-E-F-R-V-Y-S-S-A-N-N-C-T |
| 123 | 1 | 1649.73 | H-R-S-Y-L-T-P-G-D-S-S-S-G-W-T |
| 124 | 1 | 1561.71 | I-T-D-A-V-D-C-A-L-D-P-L-S-E-T |
| 125 | 1 | 1681.85 | L-D-P-L-S-E-T-K-C-T-L-K-S-F-T |
| 126 | 1 | 1716.87 | C-T-L-K-S-F-T-V-E-K-G-I-Y-Q-T |
| 127 | 1 | 1766.88 | E-K-G-I-Y-Q-T-S-N-F-R-V-Q-P-T |
| 128 | 1 | 1637.87 | V-I-R-G-D-E-V-R-Q-I-A-P-G-Q-T |
| 129 | 1 | 1650.94 | R-V-V-V-L-S-F-E-L-L-H-A-P-A-T |
| 130 | 1 | 1521.82 | L-L-H-A-P-A-T-V-C-G-P-K-K-S-T |
| 131 | 1 | 1709.88 | L-V-K-N-K-C-V-N-F-N-F-N-G-L-T |
| 132 | 1 | 1507.75 | L-D-I-T-P-C-S-F-G-G-V-S-V-I-T |
| 133 | 1 | 1772.91 | T-R-G-V-Y-Y-P-D-K-V-F-R-S-S-V |
| 134 | 1 | 1627.80 | H-V-S-G-T-N-G-T-K-R-F-D-N-P-V |
| 135 | 1 | 1612.90 | K-T-Q-S-L-L-I-V-N-N-A-T-N-V-V |
| 136 | 1 | 1744.78 | K-V-C-E-F-Q-F-C-N-D-P-F-L-G-V |
| 137 | 1 | 1953.91 | Y-H-K-N-N-K-S-W-M-E-S-E-F-R-V |
| 138 | 1 | 1798.79 | F-R-V-Y-S-S-A-N-N-C-T-F-E-Y-V |
| 139 | 1 | 1639.88 | V-R-D-L-P-Q-G-F-S-A-L-E-P-L-V |
| 140 | 1 | 1504.64 | D-S-S-S-G-W-T-A-G-A-A-Y-Y-V   |
| 141 | 1 | 1767.87 | Y-Q-T-S-N-F-R-V-Q-P-T-E-S-I-V |
| 142 | 1 | 1809.88 | W-N-R-K-R-I-S-N-C-V-A-D-Y-S-V |
| 143 | 1 | 1606.79 | G-V-S-P-T-K-L-N-D-L-C-F-T-N-V |
| 144 | 1 | 1683.80 | T-N-V-Y-A-D-S-F-V-I-R-G-D-E-V |
| 145 | 1 | 1525.66 | S-T-E-I-Y-Q-A-G-S-T-P-C-N-G-V |
| 146 | 1 | 1716.80 | Y-F-P-L-Q-S-Y-G-F-Q-P-T-N-G-V |
| 147 | 1 | 1723.86 | F-Q-P-T-N-G-V-G-Y-Q-P-Y-R-V-V |
| 148 | 1 | 1617.86 | C-G-P-K-K-S-T-N-L-V-K-N-K-C-V |
| 149 | 1 | 1569.75 | K-C-V-N-F-N-F-N-G-L-T-G-T-G-V |
| 150 | 1 | 1563.77 | T-L-E-I-L-D-I-T-P-C-S-F-G-G-V |
| 151 | 1 | 1607.77 | G-T-N-T-S-N-Q-V-A-V-L-Y-Q-D-V |
| 152 | 1 | 1702.90 | P-V-A-I-H-A-D-Q-L-T-P-T-W-R-V |
| 153 | 1 | 1779.88 | K-R-F-D-N-P-V-L-P-F-N-D-G-V-Y |
| 154 | 1 | 1923.02 | Y-Y-V-G-Y-L-Q-P-R-T-F-L-L-K-Y |
| 155 | 1 | 1703.82 | P-F-G-E-V-F-N-A-T-R-F-A-S-V-Y |
| 156 | 1 | 1637.79 | Q-I-A-P-G-Q-T-G-K-I-A-D-Y-N-Y |
| 157 | 1 | 1657.72 | N-S-N-N-L-D-S-K-V-G-G-N-Y-N-Y |
| 158 | 1 | 1736.74 | N-G-V-E-G-F-N-C-Y-F-P-L-Q-S-Y |
| 159 | 2 | 1770.87 | W-R-V-Y-S-T-G-S-N-V-F-Q-T-R-A |
| 160 | 2 | 1550.78 | G-S-F-C-T-Q-L-N-R-A-L-T-G-I-A |
| 161 | 2 | 1647.80 | G-I-A-V-E-Q-D-K-N-T-Q-E-V-F-A |
| 162 | 2 | 1707.90 | F-I-E-D-L-L-F-N-K-V-T-L-A-D-A |
| 163 | 2 | 1581.86 | G-L-T-V-L-P-P-L-L-T-D-E-M-I-A |
| 164 | 2 | 1638.81 | L-T-D-E-M-I-A-Q-Y-T-S-A-L-L-A |
| 165 | 2 | 1505.76 | G-W-T-F-G-A-G-A-A-L-Q-I-P-F-A |
| 166 | 2 | 1475.72 | G-A-G-A-A-L-Q-I-P-F-A-M-Q-M-A |
| 167 | 2 | 1760.97 | L-Q-S-L-Q-T-Y-V-T-Q-Q-L-I-R-A |
| 168 | 2 | 1572.76 | K-N-F-T-T-A-P-A-I-C-H-D-G-K-A |
| 169 | 2 | 1567.65 | N-N-S-Y-E-C-D-I-P-I-G-A-G-I-C |
| 170 | 2 | 1680.71 | V-S-M-T-K-T-S-V-D-C-T-M-Y-I-C |
| 171 | 2 | 1596.72 | Y-G-D-C-L-G-D-I-A-A-R-D-L-I-C |
| 172 | 2 | 1700.76 | M-S-E-C-V-L-G-Q-S-K-R-V-D-F-C |
| 173 | 2 | 1559.87 | I-A-G-L-I-A-I-V-M-V-T-I-M-L-C |
| 174 | 2 | 1627.56 | M-V-T-I-M-L-C-C-M-T-S-C-C-S-C |
| 175 | 2 | 1584.53 | M-L-C-C-M-T-S-C-C-S-C-L-K-G-C |
| 176 | 2 | 1665.67 | C-L-I-G-A-E-H-V-N-N-S-Y-E-C-D |

|     |   |         |                               |
|-----|---|---------|-------------------------------|
| 177 | 2 | 1627.84 | T-Q-L-N-R-A-L-T-G-I-A-V-E-Q-D |
| 178 | 2 | 1624.84 | K-V-T-L-A-D-A-G-F-I-K-Q-Y-G-D |
| 179 | 2 | 1571.68 | A-D-A-G-F-I-K-Q-Y-G-D-C-L-G-D |
| 180 | 2 | 1654.92 | Q-K-F-N-G-L-T-V-L-P-P-L-L-T-D |
| 181 | 2 | 1550.75 | Q-L-S-S-N-F-G-A-I-S-S-V-L-N-D |
| 182 | 2 | 1626.71 | Q-I-I-T-T-D-N-T-F-V-S-G-N-C-D |
| 183 | 2 | 1636.77 | N-C-D-V-V-I-G-I-V-N-N-T-V-Y-D |
| 184 | 2 | 1849.87 | K-E-E-L-D-K-Y-F-K-N-H-T-S-P-D |
| 185 | 2 | 1726.91 | R-L-N-E-V-A-K-N-L-N-E-S-L-I-D |
| 186 | 2 | 1583.51 | K-G-C-C-S-C-G-S-C-C-K-F-D-E-D |
| 187 | 2 | 1712.94 | I-L-P-D-P-S-K-P-S-K-R-S-F-I-E |
| 188 | 2 | 1590.79 | E-I-R-A-S-A-N-L-A-A-T-K-M-S-E |
| 189 | 2 | 1884.84 | S-N-G-T-H-W-F-V-T-Q-R-N-F-Y-E |
| 190 | 2 | 1807.84 | V-Y-D-P-L-Q-P-E-L-D-S-F-K-E-E |
| 191 | 2 | 1783.93 | K-E-I-D-R-L-N-E-V-A-K-N-L-N-E |
| 192 | 2 | 1762.89 | L-N-E-S-L-I-D-L-Q-E-L-G-K-Y-E |
| 193 | 2 | 1675.73 | D-S-T-E-C-S-N-L-L-L-Q-Y-G-S-F |
| 194 | 2 | 1762.95 | P-S-K-P-S-K-R-S-F-I-E-D-L-L-F |
| 195 | 2 | 1632.86 | L-G-D-I-A-A-R-D-L-I-C-A-Q-K-F |
| 196 | 2 | 1820.93 | Q-N-V-L-Y-E-N-Q-K-L-I-A-N-Q-F |
| 197 | 2 | 1790.92 | V-F-L-H-V-T-Y-V-P-A-Q-E-K-N-F |
| 198 | 2 | 1711.81 | I-C-H-D-G-K-A-H-F-P-R-E-G-V-F |
| 199 | 2 | 1778.84 | F-P-R-E-G-V-F-V-S-N-G-T-H-W-F |
| 200 | 2 | 1659.71 | A-E-H-V-N-N-S-Y-E-C-D-I-P-I-G |
| 201 | 2 | 1689.93 | V-K-Q-I-Y-K-T-P-P-I-K-D-F-G-G |
| 202 | 2 | 1450.74 | L-L-A-G-T-I-T-S-G-W-T-F-G-A-G |
| 203 | 2 | 1618.86 | Q-A-L-N-T-L-V-K-Q-L-S-S-N-F-G |
| 204 | 2 | 1684.89 | D-K-V-E-A-E-V-Q-I-D-R-L-I-T-G |
| 205 | 2 | 1493.71 | S-A-N-L-A-A-T-K-M-S-E-C-V-L-G |
| 206 | 2 | 1655.78 | K-G-Y-H-L-M-S-F-P-Q-S-A-P-H-G |
| 207 | 2 | 1600.80 | G-K-A-H-F-P-R-E-G-V-F-V-S-N-G |
| 208 | 2 | 1539.68 | T-D-N-T-F-V-S-G-N-C-D-V-V-I-G |
| 209 | 2 | 1734.81 | D-K-Y-F-K-N-H-T-S-P-D-V-D-L-G |
| 210 | 2 | 1553.72 | K-N-H-T-S-P-D-V-D-L-G-D-I-S-G |
| 211 | 2 | 2072.05 | K-Y-E-Q-Y-I-K-W-P-W-Y-I-W-L-G |
| 212 | 2 | 1912.00 | Y-I-K-W-P-W-Y-I-W-L-G-F-I-A-G |
| 213 | 2 | 1484.46 | M-T-S-C-C-S-C-L-K-G-C-C-S-C-G |
| 214 | 2 | 1683.70 | C-C-K-F-D-E-D-D-S-E-P-V-L-K-G |
| 215 | 2 | 1614.78 | N-V-F-Q-T-R-A-G-C-L-I-G-A-E-H |
| 216 | 2 | 1626.77 | P-A-Q-E-K-N-F-T-T-A-P-A-I-C-H |
| 217 | 2 | 1911.93 | L-D-S-F-K-E-E-L-D-K-Y-F-K-N-H |
| 218 | 2 | 1679.83 | D-E-D-D-S-E-P-V-L-K-G-V-K-L-H |
| 219 | 2 | 1552.76 | S-T-G-S-N-V-F-Q-T-R-A-G-C-L-I |
| 220 | 2 | 1730.95 | I-G-V-T-Q-N-V-L-Y-E-N-Q-K-L-I |
| 221 | 2 | 1751.87 | Y-E-N-Q-K-L-I-A-N-Q-F-N-S-A-I |
| 222 | 2 | 1976.98 | H-W-F-V-T-Q-R-N-F-Y-E-P-Q-I-I |
| 223 | 2 | 1485.76 | D-L-G-D-I-S-G-I-N-A-S-V-V-N-I |
| 224 | 2 | 1583.88 | I-S-G-I-N-A-S-V-V-N-I-Q-K-E-I |
| 225 | 2 | 1731.96 | P-W-Y-I-W-L-G-F-I-A-G-L-I-A-I |
| 226 | 2 | 1759.03 | V-F-A-Q-V-K-Q-I-Y-K-T-P-P-I-K |
| 227 | 2 | 1652.81 | F-G-G-F-N-F-S-Q-I-L-P-D-P-S-K |
| 228 | 2 | 1648.94 | L-L-F-N-K-V-T-L-A-D-A-G-F-I-K |
| 229 | 2 | 1504.80 | K-I-Q-D-S-L-S-S-T-A-S-A-L-G-K |
| 230 | 2 | 1767.97 | V-N-I-Q-K-E-I-D-R-L-N-E-V-A-K |
| 231 | 2 | 1851.99 | L-I-D-L-Q-E-L-G-K-Y-E-Q-Y-I-K |
| 232 | 2 | 1483.48 | C-S-C-L-K-G-C-C-S-C-G-S-C-C-K |

|     |   |         |                               |
|-----|---|---------|-------------------------------|
| 233 | 2 | 1625.83 | R-S-V-A-S-Q-S-I-I-A-Y-T-M-S-L |
| 234 | 2 | 1618.87 | A-I-P-T-N-F-T-I-S-V-T-T-E-I-L |
| 235 | 2 | 1688.78 | C-S-N-L-L-L-Q-Y-G-S-F-C-T-Q-L |
| 236 | 2 | 1725.88 | L-L-Q-Y-G-S-F-C-T-Q-L-N-R-A-L |
| 237 | 2 | 1609.87 | L-G-K-L-Q-D-V-V-N-Q-N-A-Q-A-L |
| 238 | 2 | 1628.83 | L-M-S-F-P-Q-S-A-P-H-G-V-V-F-L |
| 239 | 2 | 1697.91 | V-A-K-N-L-N-E-S-L-I-D-L-Q-E-L |
| 240 | 2 | 1650.84 | N-F-T-I-S-V-T-T-E-I-L-P-V-S-M |
| 241 | 2 | 1522.70 | P-I-G-A-G-I-C-A-S-Y-Q-T-Q-T-N |
| 242 | 2 | 1583.74 | S-Q-S-I-I-A-Y-T-M-S-L-G-A-E-N |
| 243 | 2 | 1640.54 | D-C-T-M-Y-I-C-G-D-S-T-E-C-S-N |
| 244 | 2 | 1799.87 | A-L-Q-I-P-F-A-M-Q-M-A-Y-R-F-N |
| 245 | 2 | 1722.86 | R-F-N-G-I-G-V-T-Q-N-V-L-Y-E-N |
| 246 | 2 | 1556.81 | T-A-S-A-L-G-K-L-Q-D-V-V-N-Q-N |
| 247 | 2 | 1640.89 | T-Q-Q-L-I-R-A-A-E-I-R-A-S-A-N |
| 248 | 2 | 1838.87 | T-Q-R-N-F-Y-E-P-Q-I-I-T-T-D-N |
| 249 | 2 | 1548.75 | F-V-S-G-N-C-D-V-V-I-G-I-V-N-N |
| 250 | 2 | 1711.91 | N-A-S-V-V-N-I-Q-K-E-I-D-R-L-N |
| 251 | 2 | 1548.73 | A-E-N-S-V-A-Y-S-N-N-S-I-A-I-P |
| 252 | 2 | 1678.86 | P-I-K-D-F-G-G-F-N-F-S-Q-I-L-P |
| 253 | 2 | 1612.89 | L-I-C-A-Q-K-F-N-G-L-T-V-L-P-P |
| 254 | 2 | 1664.83 | V-T-Y-V-P-A-Q-E-K-N-F-T-T-A-P |
| 255 | 2 | 1640.87 | V-I-G-I-V-N-N-T-V-Y-D-P-L-Q-P |
| 256 | 2 | 1620.53 | S-C-G-S-C-C-K-F-D-E-D-D-S-E-P |
| 257 | 2 | 1538.66 | E-C-D-I-P-I-G-A-G-I-C-A-S-Y-Q |
| 258 | 2 | 1657.72 | Y-I-C-G-D-S-T-E-C-S-N-L-L-L-Q |
| 259 | 2 | 1642.85 | R-A-L-T-G-I-A-V-E-Q-D-K-N-T-Q |
| 260 | 2 | 1790.87 | E-Q-D-K-N-T-Q-E-V-F-A-Q-V-K-Q |
| 261 | 2 | 1479.73 | T-I-T-S-G-W-T-F-G-A-G-A-A-L-Q |
| 262 | 2 | 1643.93 | K-L-I-A-N-Q-F-N-S-A-I-G-K-I-Q |
| 263 | 2 | 1734.92 | I-T-G-R-L-Q-S-L-Q-T-Y-V-T-Q-Q |
| 264 | 2 | 1662.88 | P-H-G-V-V-F-L-H-V-T-Y-V-P-A-Q |
| 265 | 2 | 1680.79 | G-I-C-A-S-Y-Q-T-Q-T-N-S-P-R-R |
| 266 | 2 | 1712.91 | N-F-S-Q-I-L-P-D-P-S-K-P-S-K-R |
| 267 | 2 | 1668.82 | F-I-K-Q-Y-G-D-C-L-G-D-I-A-A-R |
| 268 | 2 | 1604.84 | N-F-G-A-I-S-S-V-L-N-D-I-L-S-R |
| 269 | 2 | 1769.95 | L-S-R-L-D-K-V-E-A-E-V-Q-I-D-R |
| 270 | 2 | 1788.97 | Q-T-Y-V-T-Q-Q-L-I-R-A-A-E-I-R |
| 271 | 2 | 1607.80 | A-A-T-K-M-S-E-C-V-L-G-Q-S-K-R |
| 272 | 2 | 1619.79 | T-A-P-A-I-C-H-D-G-K-A-H-F-P-R |
| 273 | 2 | 1733.85 | G-V-F-V-S-N-G-T-H-W-F-V-T-Q-R |
| 274 | 2 | 1540.73 | T-R-A-G-C-L-I-G-A-E-H-V-N-N-S |
| 275 | 2 | 1643.83 | Q-T-N-S-P-R-R-A-R-S-V-A-S-Q-S |
| 276 | 2 | 1542.65 | M-S-L-G-A-E-N-S-V-A-Y-S-N-N-S |
| 277 | 2 | 1592.82 | S-V-T-T-E-I-L-P-V-S-M-T-K-T-S |
| 278 | 2 | 1716.84 | Y-K-T-P-P-I-K-D-F-G-G-F-N-F-S |
| 279 | 2 | 1690.84 | L-P-P-L-L-T-D-E-M-I-A-Q-Y-T-S |
| 280 | 2 | 1620.80 | N-Q-F-N-S-A-I-G-K-I-Q-D-S-L-S |
| 281 | 2 | 1463.74 | S-A-I-G-K-I-Q-D-S-L-S-S-T-A-S |
| 282 | 2 | 1640.87 | N-Q-N-A-Q-A-L-N-T-L-V-K-Q-L-S |
| 283 | 2 | 1550.82 | T-L-V-K-Q-L-S-S-N-F-G-A-I-S-S |
| 284 | 2 | 1697.93 | A-E-V-Q-I-D-R-L-I-T-G-R-L-Q-S |
| 285 | 2 | 1726.82 | S-K-R-V-D-F-C-G-K-G-Y-H-L-M-S |
| 286 | 2 | 1715.73 | D-F-C-G-K-G-Y-H-L-M-S-F-P-Q-S |
| 287 | 2 | 1773.84 | F-Y-E-P-Q-I-I-T-T-D-N-T-F-V-S |
| 288 | 2 | 1702.79 | V-N-N-T-V-Y-D-P-L-Q-P-E-L-D-S |

|     |   |         |                               |
|-----|---|---------|-------------------------------|
| 289 | 2 | 1458.67 | S-P-D-V-D-L-G-D-I-S-G-I-N-A-S |
| 290 | 2 | 1627.78 | I-A-I-V-M-V-T-I-M-L-C-C-M-T-S |
| 291 | 2 | 1610.78 | V-A-Y-S-N-N-S-I-A-I-P-T-N-F-T |
| 292 | 2 | 1590.81 | N-N-S-I-A-I-P-T-N-F-T-I-S-V-T |
| 293 | 2 | 1622.78 | E-I-L-P-V-S-M-T-K-T-S-V-D-C-T |
| 294 | 2 | 1622.65 | K-T-S-V-D-C-T-M-Y-I-C-G-D-S-T |
| 295 | 2 | 1795.94 | N-T-Q-E-V-F-A-Q-V-K-Q-I-Y-K-T |
| 296 | 2 | 1795.97 | S-K-R-S-F-I-E-D-L-L-F-N-K-V-T |
| 297 | 2 | 1619.83 | A-A-R-D-L-I-C-A-Q-K-F-N-G-L-T |
| 298 | 2 | 1552.81 | M-I-A-Q-Y-T-S-A-L-L-A-G-T-I-T |
| 299 | 2 | 1540.77 | Y-T-S-A-L-L-A-G-T-I-T-S-G-W-T |
| 300 | 2 | 1526.84 | I-R-A-A-E-I-R-A-S-A-N-L-A-A-T |
| 301 | 2 | 1602.91 | W-L-G-F-I-A-G-L-I-A-I-V-M-V-T |
| 302 | 2 | 1699.87 | D-D-S-E-P-V-L-K-G-V-K-L-H-Y-T |
| 303 | 2 | 1749.88 | S-Y-Q-T-Q-T-N-S-P-R-R-A-R-S-V |
| 304 | 2 | 1700.81 | P-F-A-M-Q-M-A-Y-R-F-N-G-I-G-V |
| 305 | 2 | 1696.82 | Q-M-A-Y-R-F-N-G-I-G-V-T-Q-N-V |
| 306 | 2 | 1475.77 | S-L-S-S-T-A-S-A-L-G-K-L-Q-D-V |
| 307 | 2 | 1625.83 | Q-D-V-V-N-Q-N-A-Q-A-L-N-T-L-V |
| 308 | 2 | 1670.95 | I-S-S-V-L-N-D-I-L-S-R-L-D-K-V |
| 309 | 2 | 1712.92 | L-N-D-I-L-S-R-L-D-K-V-E-A-E-V |
| 310 | 2 | 1673.92 | P-R-R-A-R-S-V-A-S-Q-S-I-I-A-Y |
| 311 | 2 | 1588.73 | I-A-Y-T-M-S-L-G-A-E-N-S-V-A-Y |
| 312 | 2 | 1775.98 | I-D-R-L-I-T-G-R-L-Q-S-L-Q-T-Y |
| 313 | 2 | 1655.83 | V-L-G-Q-S-K-R-V-D-F-C-G-K-G-Y |
| 314 | 2 | 1650.84 | P-Q-S-A-P-H-G-V-V-F-L-H-V-T-Y |
| 315 | 2 | 1852.90 | L-Q-P-E-L-D-S-F-K-E-E-L-D-K-Y |
| 316 | 2 | 2029.98 | Q-E-L-G-K-Y-E-Q-Y-I-K-W-P-W-Y |

**Table S2.** Polyfunctionality of CD8+ T Cells.

|                                                  | DNA Spike |        |        |        | DNA Spike + rec muGM-CSF |        |        |        | DNA Spike + Capsule muGM-CSF |        |        |        |
|--------------------------------------------------|-----------|--------|--------|--------|--------------------------|--------|--------|--------|------------------------------|--------|--------|--------|
|                                                  | Neg       | Pool 1 | Pool 2 | Pos    | Neg                      | Pool 1 | Pool 2 | Pos    | Neg                          | Pool 1 | Pool 2 | Pos    |
| CD107a+ IL10+ TNF $\alpha$ + IL2+ IFN $\gamma$ + | 0         | 0      | 0      | 0.0231 | 0                        | 0      | 0      | 0      | 0                            | 0.049  | 0      | 0      |
| CD107a+ IL10- TNF $\alpha$ + IL2+ IFN $\gamma$ + | 0         | 0.0935 | 0      | 0.8062 | 0                        | 0.1144 | 0.0571 | 0.6899 | 0                            | 0.3814 | 0.0974 | 0.7989 |
| CD107a+ IL10+ TNF $\alpha$ + IL2- IFN $\gamma$ + | 0         | 0.0935 | 0.0576 | 0.0037 | 0                        | 0      | 0      | 0.0355 | 0                            | 0.0844 | 0.0913 | 0.0239 |
| CD107a+ IL10+ TNF $\alpha$ - IL2+ IFN $\gamma$ + | 0         | 0      | 0      | 0.013  | 0.0513                   | 0      | 0      | 0      | 0                            | 0      | 0      | 0      |
| CD107a+ IL10+ TNF $\alpha$ + IL2+ IFN $\gamma$ - | 0         | 0      | 0      | 0.0047 | 0                        | 0      | 0      | 0      | 0                            | 0      | 0      | 0      |
| CD107a- IL10+ TNF $\alpha$ + IL2+ IFN $\gamma$ + | 0         | 0.1085 | 0.0614 | 0.0751 | 0.4649                   | 0.0539 | 1.2603 | 0.0431 | 0.4898                       | 0.4958 | 0.0974 | 0.0522 |
| CD107a+ IL10- TNF $\alpha$ + IL2- IFN $\gamma$ + | 0.1348    | 0.4341 | 0.119  | 3.258  | 0.0664                   | 0.8853 | 0.4188 | 2.9234 | 0.1111                       | 1.2613 | 0.9644 | 2.4974 |
| CD107a+ IL10+ TNF $\alpha$ - IL2- IFN $\gamma$ + | 0         | 0.0452 | 0.119  | 0.0366 | 0                        | 0      | 0.1257 | 0.0634 | 0                            | 0.0381 | 0.0882 | 0.0837 |
| CD107a+ IL10- TNF $\alpha$ - IL2+ IFN $\gamma$ + | 0         | 0      | 0      | 0.742  | 0                        | 0      | 0      | 0.381  | 0                            | 0      | 0      | 0.6271 |
| CD107a+ IL10+ TNF $\alpha$ - IL2+ IFN $\gamma$ - | 0         | 0      | 0      | 0      | 0                        | 0      | 0      | 0      | 0                            | 0      | 0      | 0      |
| CD107a+ IL10+ TNF $\alpha$ + IL2- IFN $\gamma$ - | 0.149     | 0.0452 | 0.0537 | 0      | 0                        | 0.0471 | 0.2513 | 0      | 0                            | 0      | 0      | 0.0044 |



|                                                  |         |         |         |         |        |         |         |         |         |         |         |         |
|--------------------------------------------------|---------|---------|---------|---------|--------|---------|---------|---------|---------|---------|---------|---------|
| CD107a- IL10+ TNF $\alpha$ + IL2+ IFN $\gamma$ - | 0       | 0       | 0       | 0.0039  | 0      | 0       | 0       | 0.0098  | 0       | 0       | 0       | 0.0031  |
| CD107a- IL10+ TNF $\alpha$ - IL2+ IFN $\gamma$ + | 0.0603  | 0.1869  | 0.1727  | 0.0229  | 0.1268 | 0.2222  | 0.3617  | 0.0244  | 0.1969  | 0.4222  | 0.0913  | 0.0542  |
| CD107a+ IL10- TNF $\alpha$ + IL2+ IFN $\gamma$ - | 0       | 0.1568  | 0.0614  | 0.0506  | 0      | 0.101   | 0.1599  | 0.0358  | 0       | 0.2506  | 0       | 0.2222  |
| CD107a- IL10- TNF $\alpha$ + IL2+ IFN $\gamma$ + | 0       | 0.1869  | 0.1765  | 3.9703  | 0      | 0.2727  | 0.0685  | 4.7895  | 0       | 0.2098  | 0.1856  | 4.3106  |
| CD107a- IL10+ TNF $\alpha$ + IL2- IFN $\gamma$ + | 0       | 0.4492  | 0.2878  | 0.0835  | 0      | 0.4376  | 0.3808  | 0.0191  | 0.1187  | 0.1389  | 0.1947  | 0.0697  |
| CD107a+ IL10- TNF $\alpha$ - IL2- IFN $\gamma$ + | 0.653   | 0.6693  | 1.3049  | 13.6859 | 0.818  | 0.717   | 1.7134  | 10.7549 | 0.871   | 1.6127  | 1.4695  | 11.2435 |
| CD107a+ IL10- TNF $\alpha$ + IL2- IFN $\gamma$ - | 0.2094  | 0.9647  | 1.0209  | 0.1673  | 0      | 0.8112  | 1.2641  | 0.1543  | 0.3434  | 1.599   | 1.798   | 0.0918  |
| CD107a+ IL10- TNF $\alpha$ - IL2+ IFN $\gamma$ - | 0       | 0       | 0       | 0.0806  | 0      | 0       | 0.0419  | 0.0366  | 0.0429  | 0.0409  | 0.1339  | 0.1275  |
| CD107a+ IL10+ TNF $\alpha$ - IL2- IFN $\gamma$ - | 0.5217  | 0.2321  | 0.1765  | 0.0051  | 0.166  | 0.1683  | 0.4683  | 0.0151  | 0.0631  | 0.1743  | 0.1856  | 0.0075  |
| CD107a- IL10- TNF $\alpha$ + IL2- IFN $\gamma$ + | 0.0745  | 1.6159  | 1.397   | 16.8726 | 0.1207 | 2.5481  | 1.7972  | 17.355  | 0.048   | 1.8088  | 1.5729  | 11.7704 |
| CD107a- IL10- TNF $\alpha$ - IL2+ IFN $\gamma$ + | 0       | 0       | 0       | 3.5018  | 0      | 0       | 0.0685  | 3.0871  | 0       | 0.049   | 0       | 4.1573  |
| CD107a- IL10+ TNF $\alpha$ - IL2- IFN $\gamma$ + | 0.2129  | 0.5457  | 0.7714  | 0.137   | 0.1751 | 0.1919  | 0.7958  | 0.1825  | 0.4898  | 0.4222  | 0.1734  | 0.1766  |
| CD107a- IL10- TNF $\alpha$ + IL2+ IFN $\gamma$ - | 0       | 0.4884  | 0.2917  | 0.3092  | 0      | 0.3669  | 0.1637  | 0.3428  | 0       | 0.5748  | 0.3134  | 1.019   |
| CD107a- IL10+ TNF $\alpha$ + IL2- IFN $\gamma$ - | 0       | 0.5246  | 0.1228  | 0       | 0.0513 | 0.2255  | 0.2361  | 0       | 0       | 0.1335  | 0       | 0       |
| CD107a- IL10+ TNF $\alpha$ - IL2+ IFN $\gamma$ - | 0.1207  | 0       | 0       | 0       | 0.1721 | 0       | 0.1371  | 0       | 0.0631  | 0       | 0.0974  | 0.004   |
| CD107a+ IL10- TNF $\alpha$ - IL2- IFN $\gamma$ - | 76.81   | 46.9919 | 57.2407 | 5.776   | 79.942 | 50.0648 | 54.1038 | 4.4619  | 81.8791 | 52.0579 | 59.3572 | 3.4489  |
| CD107a- IL10- TNF $\alpha$ - IL2- IFN $\gamma$ + | 1.4872  | 7.2737  | 7.8387  | 48.873  | 3.7216 | 13.098  | 10.731  | 52.9218 | 5.2914  | 11.2846 | 10.9686 | 57.5229 |
| CD107a- IL10- TNF $\alpha$ + IL2- IFN $\gamma$ - | 3.9263  | 17.1036 | 14.1057 | 0.825   | 4.3977 | 19.7298 | 14.4932 | 1.0738  | 4.6774  | 21.09   | 17.4611 | 0.7123  |
| CD107a- IL10- TNF $\alpha$ - IL2+ IFN $\gamma$ - | 4.5859  | 3.5361  | 4.0325  | 0.642   | 5.851  | 3.2414  | 5.9868  | 0.5798  | 3.9039  | 3.1922  | 3.9856  | 0.947   |
| CD107a- IL10+ TNF $\alpha$ - IL2- IFN $\gamma$ - | 11.0597 | 18.2354 | 10.5689 | 0.0311  | 3.865  | 5.1252  | 4.8981  | 0.0195  | 1.4126  | 2.6143  | 0.6725  | 0.0238  |
